# Supplementary material for: Multifunctional property exploration: Bi4O5I2 with high visible light photocatalytic performance and a large nonlinear optical effect
Source: Royal Society of Chemistry journal article supplement (doi:10.1039/c8ra08984a), 2019-01-01
Supplement: c8ra08984a1.pdf [file c8ra08984a1.pdf]

Research Highlights of “Multifunctional property exploration:  $\text{Bi}_4\text{O}_5\text{I}_2$  with highly visible light photocatalytic performance and large nonlinear optical effect”

Fig. S1 EDS patterns of  $\text{BiOI}$  (a) and  $\text{Bi}_4\text{O}_5\text{I}_2$  (b) samples

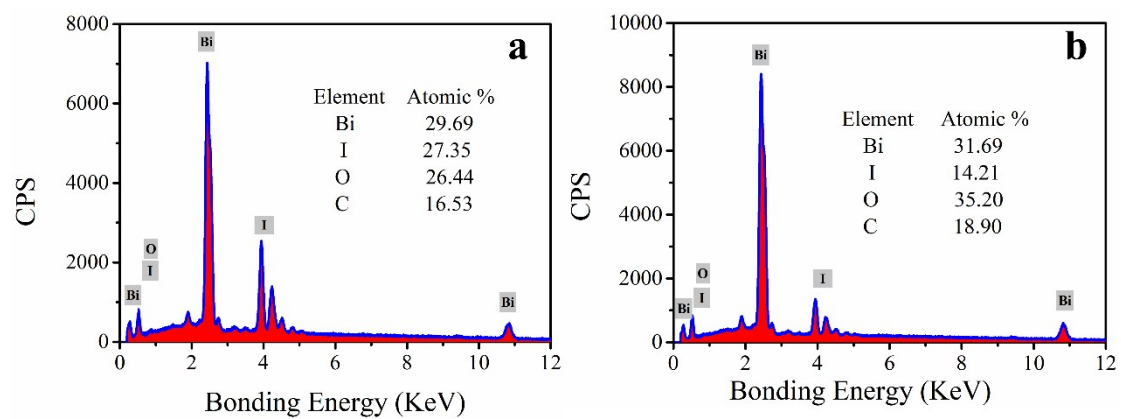

**Fig. S2** Photocatalytic activity of Blank (the initial concentration of 10 mg/L, catalyst is 50mg and without light),  $\text{Bi}_4\text{O}_5\text{I}_2$ , and P25 for degradation of MO under visible light irradiation (the initial concentration of 10 mg/L and amount of catalyst is 50mg) (a), effect of MO initial concentration on the photocatalytic performances of  $\text{Bi}_4\text{O}_5\text{I}_2$  (b), photocatalytic degradation of MO, RhB, MB over  $\text{BiOI}$  and  $\text{Bi}_4\text{O}_5\text{I}_2$  samples, respectively (c), photocatalytic activity of  $\text{Bi}_4\text{O}_5\text{I}_2$  for degradation of norfloxacin under visible light irradiation (d)

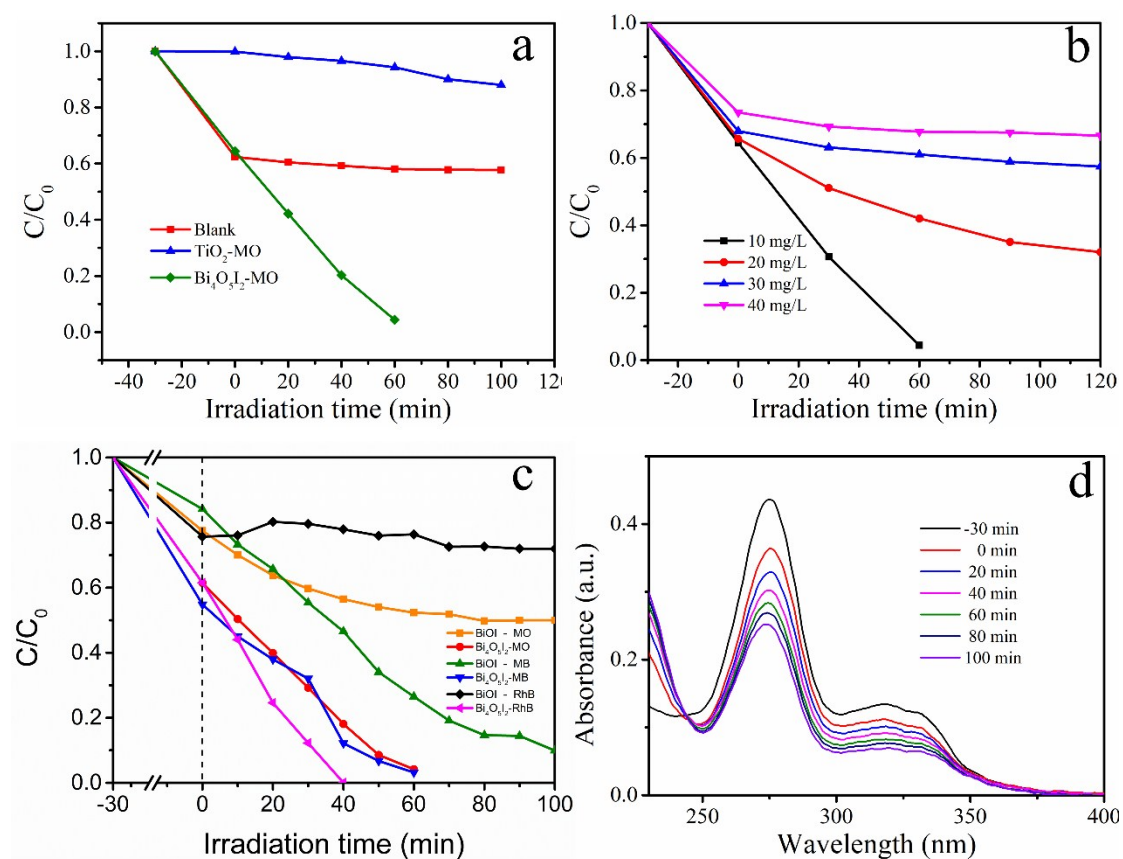

**Fig. S3** Free radicals trapping experiment of  $\text{Bi}_4\text{O}_5\text{I}_2$  photocatalysts under visible light irradiation (a), Recycling property of  $\text{Bi}_4\text{O}_5\text{I}_2$  photocatalyst (b), PL spectra of BiOI and  $\text{Bi}_4\text{O}_5\text{I}_2$  (c), Mott-Schottky plots of the  $\text{Bi}_4\text{O}_5\text{I}_2$  samples (d)

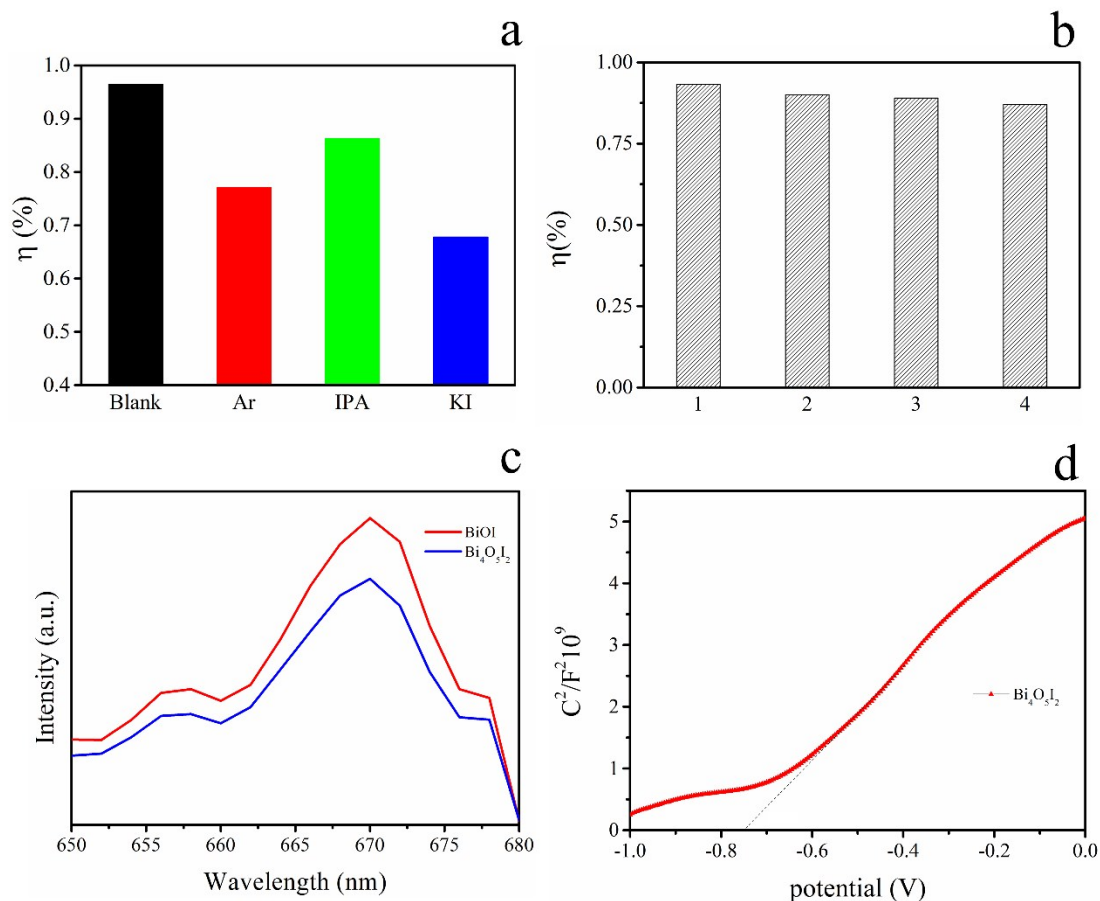

**Table ESI-1.** Pseudo-first-order kinetics parameter of MO

| Pseudo-First-Order reaction       |                                    |        |                |
|-----------------------------------|------------------------------------|--------|----------------|
| catalyst                          | $k_{app}$<br>( $\text{min}^{-1}$ ) | $R^2$  | Stansard error |
| BiOI                              | 0.0042                             | 0.8636 | 0.0005         |
| $\text{Bi}_4\text{O}_5\text{I}_2$ | 0.0443                             | 0.9237 | 0.0052         |

An internal polar electric field is constructed along the  $ab$  plane in the crystal structure of  $\text{Bi}_4\text{O}_5\text{I}_2$  and the alignment of  $\text{BiO}_4\text{I}_4$ ,  $\text{BiO}_5\text{I}_3$ ,  $\text{BiO}_6\text{I}$ ,  $\text{BiO}_3\text{I}_4$  and  $\text{BiO}_3\text{I}_5$  polyhedron in an individual polyhedra.

The bond-valence-sum  $V_i$  for each atom  $i$  is defined as

$$V_i = \sum_j S_{ij} = \sum_j \exp\left[\frac{R_0 - R_{ij}}{B}\right]$$

where B is a constant with value 0.37.  $R_0$  and  $R_{ij}$  represent the reference and actual lengths of the bond i-j that the atom i makes with the surrounding atoms j, respectively, and  $S_{ij}$  is the corresponding bond valence. R represents the difference between the “centroids” of the positive ( $r^+$ ) and negative charges ( $r^-$ ).

$$R = r^+ - r^-$$

For a given Bii-Oj bond with the actual bond length  $R_{ij}$ , the nuclear charges of Bi and O are 83 and 8, respectively

$$(83 - V_i) \times r^- = (8 + S_{ij}) \times (R_{ij} - r^-)$$

Then, in units of Debye, in which R is measured by Å and the charge by statcoulomb, the net bond dipole moment  $\mu_{ij}$  of the Bii-Oj bond is then calculated using the expression

$$\mu_{ij} = n_{ij} e R$$

$$n_{ij} = (83 - V_i) + (8 + S_{ij})$$

where  $n_{ij}$  is the number of electrons forming the Bii-Oj, and e the electron charge (i.e.,  $4.8 \times 10^{-10}$  statcoulombs in cgs unit)

**Table ESI-2.** Dipole moments of  $\text{BiO}_4$ ,  $\text{BiO}_5$ ,  $\text{BiO}_6$ ,  $\text{Bi(1)O}_3$ ,  $\text{BiO}_3$  polyhedra in  $\text{Bi}_4\text{O}_5\text{I}_2$  crystal

| Polyhedral Unit                            | $\text{Bi(1)O}_4$ | $\text{Bi(3)O}_4$ | $\text{Bi(1)O}_5$ | $\text{Bi(3)O}_5$ | $\text{Bi(1)O}_6$ | $\text{Bi(3)O}_6$ | $\text{Bi(1)O}_3$ | $\text{Bi(1)O}_3$ | total |
|--------------------------------------------|-------------------|-------------------|-------------------|-------------------|-------------------|-------------------|-------------------|-------------------|-------|
| Polyhedral Moment (esu·cm/Å <sup>3</sup> ) | 0.149             | 0.141             | 0.117             | 0.118             | 0.069             | 0.065             | 0.163             | 0.12              |       |
| X                                          | -18.75            | -17.4             | -22.08            | -13.37            | 9.79              | -5.09             | -14.29            | -1.74             |       |
| Y                                          | 0.76              | 0.82              | 3.3               | -7.37             | -6.68             | 5.51              | 2.28              | -3.32             |       |
| Z                                          | 26.71             | 25.64             | 12.79             | -8.45             | 11.42             | 25.99             | -33.42            | 27.62             |       |
| Polyhedral Unit                            | $\text{Bi(2)O}_4$ | $\text{Bi(4)O}_4$ | $\text{Bi(2)O}_5$ | $\text{Bi(4)O}_5$ | $\text{Bi(2)O}_6$ | $\text{Bi(4)O}_6$ | $\text{Bi(2)O}_3$ | $\text{Bi(2)O}_3$ |       |
| Polyhedral Moment (esu·cm/Å <sup>3</sup> ) | 0.149             | 0.141             | 0.117             | 0.118             | 0.069             | 0.065             | 0.163             | 0.12              |       |
| X                                          | 18.75             | 17.4              | 22.08             | 13.37             | -9.79             | 5.09              | 14.29             | 1.74              | 0     |
| Y                                          | 0.76              | 0.82              | 3.3               | -7.37             | -6.68             | 5.51              | 2.28              | -3.32             | -9.4  |
| Z                                          | -26.71            | -25.64            | -12.79            | 8.45              | -11.42            | -25.99            | -33.42            | -27.62            | 0     |
